# Supplementary material
Source: HighWire-hosted journal article supplement (https://bmjopen.bmj.com/content/7/8/e015456)
Supplement: inline-supplementary-material-2 [file inline-supplementary-material-2.pdf]

## Appendix B: Detailed Characteristics of Individual Studies

| Name                               | Country | Targeted disparity                                         | Pediatric population | Environment/Community              | Health care provider and systems                                                                                                                                                                                                          | Individual characteristics and behaviors                                                                                                                                                            | Health and public policies                | Methodological quality |
|------------------------------------|---------|------------------------------------------------------------|----------------------|------------------------------------|-------------------------------------------------------------------------------------------------------------------------------------------------------------------------------------------------------------------------------------------|-----------------------------------------------------------------------------------------------------------------------------------------------------------------------------------------------------|-------------------------------------------|------------------------|
| Acevedo-Garcia, 2013 <sup>53</sup> | USA     | Mental health                                              | Minority children    | Neighborhoods, schools, employment |                                                                                                                                                                                                                                           | Stress (physiological response), cognitive and social/emotional development, racial/ethnic identity development, health behaviors                                                                   |                                           | Unclear                |
| Aiken, 2004 <sup>78</sup>          | USA     | General health                                             | Low income children  |                                    |                                                                                                                                                                                                                                           |                                                                                                                                                                                                     | Insurance status                          | Low                    |
| Angier, 2014 <sup>68</sup>         | USA     | Access to health care                                      | Low-income children  |                                    | Availability (supply of providers, clinic sites, and programs), affordability (prices, ability to pay, deductibles, co-payments, medications), acceptability of care (attitudes about providers, continuous relationship with a provider) | Decisions based on availability, affordability, and acceptability of care, loss of perceived acceptability and availability due to affordability                                                    | Health insurance coverage (Medicaid, ACA) | Medium                 |
| Bhatia, 2011 <sup>11</sup>         | USA     | Disparities in disease-free survival to long-term outcomes | Children with cancer | SES                                | Access to care, diagnosis delays, enrollment in clinical trials, late-treatment related outcomes, lower quality of treatment                                                                                                              | Knowledge about disease and possible treatments, disease biology, pharmacogenetics, adherence to treatment, parental risky health behaviors (smoking, binge or heavy drinking, physical inactivity) | Health insurance coverage                 | Medium                 |

| Name                         | Country | Targeted disparity                          | Pediatric population        | Environment/Community                                                                      | Health care provider and systems                                                                                                                                                                                                                                                            | Individual characteristics and behaviors                                                                                                                                                                                                                                                                                   | Health and public policies                 | Methodological quality |
|------------------------------|---------|---------------------------------------------|-----------------------------|--------------------------------------------------------------------------------------------|---------------------------------------------------------------------------------------------------------------------------------------------------------------------------------------------------------------------------------------------------------------------------------------------|----------------------------------------------------------------------------------------------------------------------------------------------------------------------------------------------------------------------------------------------------------------------------------------------------------------------------|--------------------------------------------|------------------------|
| Braveman, 2009 <sup>60</sup> | USA     | General health                              | Non-specific                | Social and economic opportunities (employment), racial discrimination                      |                                                                                                                                                                                                                                                                                             | Specific exposure early in life, type of disease or injury, trauma and adversity, familial abuse, risk factors (underweight, inadequate pregnancy weight gain, chronic disease), living and housing conditions, social position by race and class, social stratification, unequal outcomes/consequences, income inequality | Social security, health insurance coverage | Good                   |
| Canino, 2006 <sup>36</sup>   | USA     | Asthma prevalence, morbidity, and treatment | Latino children with asthma | Indoor allergens, outdoor allergens, pollution, environmental stress (crime, overcrowding) | Access to and quality of care, reimbursement practices, cultural sensitivity, work force diversity, use of evidence based medicine, work overload, available resources, training, beliefs (unintentional bias, stereotyping, language barriers), regular provider, continuity of care, non- | Inherent factors (genetics and biological factors, race/ethnicity), modifiable factors (knowledge and beliefs about disease, illness management like the use of home remedies, stress)                                                                                                                                     | Health insurance coverage                  | Good                   |

| Name                                         | Country             | Targeted disparity              | Pediatric population          | Environment/Community                                                                    | Health care provider and systems                                                                                                                                                                                                                                                   | Individual characteristics and behaviors                                                                                                                              | Health and public policies                                                            | Methodological quality |
|----------------------------------------------|---------------------|---------------------------------|-------------------------------|------------------------------------------------------------------------------------------|------------------------------------------------------------------------------------------------------------------------------------------------------------------------------------------------------------------------------------------------------------------------------------|-----------------------------------------------------------------------------------------------------------------------------------------------------------------------|---------------------------------------------------------------------------------------|------------------------|
|                                              |                     |                                 |                               |                                                                                          | trusted provider                                                                                                                                                                                                                                                                   |                                                                                                                                                                       |                                                                                       |                        |
| Canino, 2009 <sup>37</sup>                   | USA and Puerto Rico | Asthma prevalence and morbidity | Hispanic children with asthma | Indoor/outdoor exposure to allergens, pollution, crime, overcrowding housing, insecurity | Reimbursement funds, cultural sensitivity, work force diversity, use of evidence based medicine, quality of care, access to care, stereotyping, discrimination, clinician's training, prescription practices, patient-provider interaction, communications, shared decision making | Genetics and biological factors, race/ethnicity, health literacy, illness management (use of CAAM, non-welfare care), immigration status, LEP, acculturation, poverty | Regulation at state and federal levels, health insurance coverage                     | Good                   |
| Canino, McQuaid and Rand, 2009 <sup>38</sup> | US Territory        | Asthma                          | Non-specific                  | Indoor/outdoor allergens, pollution, environmental stress                                | Access to care, quality of care, cultural sensitivity, work force diversity, use of evidence based care, stereotyping attitudes of minority groups, clinician's training, prescription practices, diagnosis of severity, provider/patient interaction                              | Genetic and biological factors, race/ethnicity, beliefs, health literacy, illness management, poverty                                                                 | Regulation at state and federal levels, health insurance status, reimbursement levels | Good                   |

| Name                              | Country | Targeted disparity                                               | Pediatric population   | Environment/Community                                                                                                                                                         | Health care provider and systems                                                                                                                               | Individual characteristics and behaviors                                                                       | Health and public policies            | Methodological quality |
|-----------------------------------|---------|------------------------------------------------------------------|------------------------|-------------------------------------------------------------------------------------------------------------------------------------------------------------------------------|----------------------------------------------------------------------------------------------------------------------------------------------------------------|----------------------------------------------------------------------------------------------------------------|---------------------------------------|------------------------|
| Chan, 2010 <sup>39</sup>          | Macau   | Infant mortality rates                                           | Infant                 | Gross domestic product (GDP) per capita, income per capita, unemployment rates, birth rates, marital rate, birth age, high school graduation rate                             | Access to general/specialty care, public expenditure on health care, delayed care, delayed diagnosis                                                           | Income insecurity, education status                                                                            |                                       | Medium                 |
| Cheng, 2015 <sup>40</sup>         |         | General child health, disease prevalence, morbidity and outcomes | Non-specific           | SES, cultural beliefs, discrimination, unemployment                                                                                                                           | Quality of care                                                                                                                                                | Genetics and biological factors, race/ethnicity, ancestry, immigration status, acculturation, language (LEP)   | Policies to address income inequality | Medium                 |
| Chi, 2013 <sup>61</sup>           | USA     | Dental care                                                      | Alaska native children | Free toothbrushes, exposure to fluorides, school-based tooth brushing, fluoridated milk in schools, healthy stores, community water fluoridation, promotion of drinking water | Provider shortages                                                                                                                                             | Dietary modification, oral hygiene, dental visits, carbohydrates intake, social support, home health visitors, | Soda taxes                            | Low                    |
| Clauss-Ehlers, 2003 <sup>74</sup> | USA     | General health                                                   | Minority children      |                                                                                                                                                                               | Usual source of care, health insurance coverage, interaction with health care's cultural environment, cultural values reflected in health care delivery system |                                                                                                                |                                       | Low                    |

| Name                             | Country | Targeted disparity              | Pediatric population               | Environment/Community                                                                                                                                                                                                                                                                  | Health care provider and systems                                                                                                                                                     | Individual characteristics and behaviors                                                                                                                                                                                                                                                                              | Health and public policies | Methodological quality |
|----------------------------------|---------|---------------------------------|------------------------------------|----------------------------------------------------------------------------------------------------------------------------------------------------------------------------------------------------------------------------------------------------------------------------------------|--------------------------------------------------------------------------------------------------------------------------------------------------------------------------------------|-----------------------------------------------------------------------------------------------------------------------------------------------------------------------------------------------------------------------------------------------------------------------------------------------------------------------|----------------------------|------------------------|
| Eiraldi, 2006 <sup>76</sup>      | USA     | Mental health                   | Ethnic minority children with ADHD |                                                                                                                                                                                                                                                                                        | Problem recognition, decision to seek help, service selection, service utilization patterns                                                                                          |                                                                                                                                                                                                                                                                                                                       |                            | Unclear                |
| Fisher-Owens, 2013 <sup>41</sup> | USA     | Oral health and oral healthcare | Children aged 2-17                 | Perceived neighborhood support, population in poverty, positive neighborhood attributes (sidewalks, play areas, recreation center, library/bookmobile), negative neighborhood attributes (litter, dilapidated housing, vandalism, safety), population with access to fluoridated water | Supply of dentists, dentists participating in Medicaid, population in dental health professional shortage areas, race/ethnicity distribution of practicing dentists, use of sealants | Race/ethnicity, sex, biologic/genetic endowment, birth order, age, special health care needs, preventive medical care, parental education, family poverty status, parental physical health and mental health, use of tobacco products, parental coping with child raising, language, family structure, household size |                            | Good                   |
| Flores, 2006 <sup>42</sup>       | USA     | Racial/ethnic disparities       | Non-specific                       |                                                                                                                                                                                                                                                                                        | Omission and deviations from optimal practice, insufficient data collection and monitoring, patient safety, hospital, patient views                                                  | Age, birthweight, complexity and severity, ED use, language                                                                                                                                                                                                                                                           |                            | Unclear                |

| Name                       | Country                | Targeted disparity        | Pediatric population | Environment/ Community | Health care provider and systems                                                                                                                       | Individual characteristics and behaviors                                                                                                                                                                                      | Health and public policies | Methodological quality |
|----------------------------|------------------------|---------------------------|----------------------|------------------------|--------------------------------------------------------------------------------------------------------------------------------------------------------|-------------------------------------------------------------------------------------------------------------------------------------------------------------------------------------------------------------------------------|----------------------------|------------------------|
| Fraser, 2013 <sup>67</sup> | USA                    | Maternal and child health | Non-specific         |                        | Access to basic health care services, care coordination, information systems, translation services/ interpreters, health education                     | Lack of understanding of health care system                                                                                                                                                                                   | Medicaid                   | Low                    |
| Gao, 2010 <sup>43</sup>    | Malaysia and Singapore | Oral health               | Preschoolers         |                        |                                                                                                                                                        | Ethnicity, feeding practices/ dietary habits, parental education level, knowledge and attitude, understanding when to seek care for the child, understanding of consequences of poor health, SES, housing type (rent vs. own) |                            | Low                    |
| Graham, 2004 <sup>44</sup> | UK                     | General health            | Disadvantaged youth  |                        |                                                                                                                                                        | Parental background, physical and emotional health, cognition, education, social identities, health behavior                                                                                                                  |                            | Unclear                |
| Halfon, 1995 <sup>45</sup> | USA                    | General health            | Children with Asthma |                        | Appropriately trained and located providers, regular sources of primary care, the manner in which services are organized, current managed care models, | Cultural beliefs and values, parental education, family structure, income, family social support                                                                                                                              |                            | Unclear                |

| Name                        | Country | Targeted disparity                     | Pediatric population                                | Environment/ Community                                                                                                                                                              | Health care provider and systems                                               | Individual characteristics and behaviors                                                                                                                        | Health and public policies | Methodological quality |
|-----------------------------|---------|----------------------------------------|-----------------------------------------------------|-------------------------------------------------------------------------------------------------------------------------------------------------------------------------------------|--------------------------------------------------------------------------------|-----------------------------------------------------------------------------------------------------------------------------------------------------------------|----------------------------|------------------------|
|                             |         |                                        |                                                     |                                                                                                                                                                                     | geographic availability of providers, provider training, regular care provider |                                                                                                                                                                 |                            |                        |
| Huang, 2014 <sup>75</sup>   | USA     | Mental health                          | Asian American                                      | Inequalities in social status, service access and the quality of living environments, financial capital, family levels of English proficiency, parental stress, parenting practices | Access to mental health services (bilingual mental health professionals)       |                                                                                                                                                                 |                            | Medium                 |
| Johnson, 2014 <sup>59</sup> | USA     | Physical and mental health disparities | Lesbian, gay, bisexual and transgender youth        |                                                                                                                                                                                     |                                                                                | Emotional isolation, identity concealment, cognitive isolation, social isolation, social support, social withdrawal, victimization, contact with LGBT community |                            | Unclear                |
| Kane, 2005 <sup>56</sup>    | USA     | Routine care and specialty care        | Mississippi children with special health care needs |                                                                                                                                                                                     | Barriers to care – reporting need for care and not receiving it                | Age, sex, race, residence, mother's education level (limited to non-Hispanic blacks and white), illness severity and illness stability via parental report      |                            | Unclear                |

| Name                        | Country | Targeted disparity    | Pediatric population                                 | Environment/Community                                                                                                                                                                                | Health care provider and systems                    | Individual characteristics and behaviors                                                                                                                                                                                              | Health and public policies                                            | Methodological quality |
|-----------------------------|---------|-----------------------|------------------------------------------------------|------------------------------------------------------------------------------------------------------------------------------------------------------------------------------------------------------|-----------------------------------------------------|---------------------------------------------------------------------------------------------------------------------------------------------------------------------------------------------------------------------------------------|-----------------------------------------------------------------------|------------------------|
| Lambert, 2014 <sup>46</sup> | Ireland | General health        | Adolescents and young people with chronic conditions |                                                                                                                                                                                                      | Access to care, interactions with peers and parents | Age, race, gender, culture, social, individual cognitive and physical skills, media use, basic functional skill (e.g. reading, writing and numeracy), fundamental skills (e.g. cognitive analysis, problem-solving and social skills) |                                                                       | Low                    |
| Lee, 2013 <sup>47</sup>     | USA     | General health        | Adolescents                                          |                                                                                                                                                                                                      |                                                     | Racial/ethnic                                                                                                                                                                                                                         |                                                                       | Low                    |
| Li, 2009 <sup>57</sup>      | USA     | Asthma                | Children with asthma in Tarrant County, Texas        | Neighborhood SES, built environment, public service availability                                                                                                                                     |                                                     | Socio-demographics                                                                                                                                                                                                                    |                                                                       | Medium                 |
| Lindsay, 2015 <sup>48</sup> | Canada  | Labor market outcomes | Youth with physical disabilities                     | Age discrimination attitudes, attitude towards youth with disabilities, employers lacking experience and knowledge of people with disabilities, youth perceived societal stigma regarding disability |                                                     | Parent's employment, location, school, work, social networks,                                                                                                                                                                         | Economic policies (lack of jobs, lack of accessible work places etc.) | Good                   |



| Name                       | Country | Targeted disparity                                                      | Pediatric population                                                           | Environment/ Community                                                                                                                        | Health care provider and systems                                                                                                                                                                                                             | Individual characteristics and behaviors                                                                                                   | Health and public policies | Methodological quality |
|----------------------------|---------|-------------------------------------------------------------------------|--------------------------------------------------------------------------------|-----------------------------------------------------------------------------------------------------------------------------------------------|----------------------------------------------------------------------------------------------------------------------------------------------------------------------------------------------------------------------------------------------|--------------------------------------------------------------------------------------------------------------------------------------------|----------------------------|------------------------|
| Linton, 2008 <sup>64</sup> | USA     | Pediatric palliative and end-of-life care                               | Non-specific                                                                   | Poverty, SES, social class                                                                                                                    | Health care system structure (especially hospital & hospice supply), access to care, provider bias, prejudice, stereotypes, concordance of race, quality of information exchange, trust, specific encounters and interactions with providers | Perceptions of control, religion and spirituality, medical conditions, family structure                                                    | SCHIP status/ coverage     | Medium                 |
| Liu, 2007 <sup>54</sup>    | USA     | Oral health                                                             | Non-specific                                                                   | Geographic location                                                                                                                           |                                                                                                                                                                                                                                              | Age, gender, race/ ethnicity, nativity, family structure, parental education, language, family income,                                     |                            | Good                   |
| Lynam, 2008 <sup>65</sup>  | Canada  | Existing tertiary and primary services and provide community-based care | Children who are most vulnerable (social, material, and cultural disadvantage) | Access to a full range of developmentally appropriate community-based resources (appropriate community recreation and/or child care services) | Avenue for primary health care access and/or referral for appropriate tertiary assessments, enduring, supportive relationships between providers and patients and their family, how patients anticipate that they                            | Perception of care received in community clinics and physician offices, poverty, substance use, family violence, caregivers' health status |                            | Medium                 |

| Name                         | Country   | Targeted disparity | Pediatric population                                | Environment/Community                                                                                                                                            | Health care provider and systems                                                                                                                      | Individual characteristics and behaviors                                                                                                                                                | Health and public policies                   | Methodological quality |
|------------------------------|-----------|--------------------|-----------------------------------------------------|------------------------------------------------------------------------------------------------------------------------------------------------------------------|-------------------------------------------------------------------------------------------------------------------------------------------------------|-----------------------------------------------------------------------------------------------------------------------------------------------------------------------------------------|----------------------------------------------|------------------------|
|                              |           |                    |                                                     |                                                                                                                                                                  | will be treated in community clinics or physician offices, worries that health concerns will be dismissed, fearful of the power held by practitioners |                                                                                                                                                                                         |                                              |                        |
| Mohajer, 2010 <sup>49</sup>  | Australia | General health     | Marginalized adolescents, out-of-school, vulnerable |                                                                                                                                                                  |                                                                                                                                                       | Education, religion/spirituality, family structure                                                                                                                                      |                                              | Low                    |
| Mollborn, 2012 <sup>35</sup> | USA       | General health     | Children of teen mothers                            |                                                                                                                                                                  | Patient experience                                                                                                                                    | Race, birth sex, parenting skill, household resources, maternal education, food security, rent/own home, employment, maternal age, pre-existing social disadvantage, socializing habits |                                              | Medium                 |
| Murphey, 2009 <sup>70</sup>  | USA       | Oral health        | Pregnant minority adolescents                       | Natural environment (fluoridated water), sugar in school environment, school curricula (oral hygiene), cultural importance of oral health, school-based services | Supply of dentists, location of dental services, stress, dental anxiety                                                                               | Behavioral-specific cognitions, biological processes, health behaviors (oral hygiene, sugar consumption)                                                                                | Dental insurance, dental practice regulation | Good                   |

| Name                         | Country | Targeted disparity                                                                                                                                                              | Pediatric population           | Environment/Community | Health care provider and systems                                                                               | Individual characteristics and behaviors                                                                                                                                                | Health and public policies                           | Methodological quality |
|------------------------------|---------|---------------------------------------------------------------------------------------------------------------------------------------------------------------------------------|--------------------------------|-----------------------|----------------------------------------------------------------------------------------------------------------|-----------------------------------------------------------------------------------------------------------------------------------------------------------------------------------------|------------------------------------------------------|------------------------|
| Ochoa, 2009 <sup>73</sup>    | USA     | General health                                                                                                                                                                  | Non-specific                   |                       | Availability of pediatricians                                                                                  |                                                                                                                                                                                         | Political will (public or professional constituency) | Low                    |
| Park, 2014 <sup>50</sup>     | USA     | Racial/ethnic disparities                                                                                                                                                       | Children with mental disorders |                       | Usual source of care, family-centered care, problem-free referrals, coordinated care, personal doctor or nurse | Race/ethnicity, age, gender, family structure, parental education, comorbidities, family income                                                                                         | Health insurance status                              | Good                   |
| Polonijo, 2013 <sup>66</sup> | USA     | HPV vaccination (knowledge about the vaccine, receipt of a health professional recommendation to vaccinate, and initiation and completion of the three-shot vaccination series) | Adolescent                     | Social connections    | Vaccine recommendation                                                                                         | Parental knowledge                                                                                                                                                                      |                                                      | Good                   |
| Prado, 2011 <sup>34</sup>    | USA     | Substance use and unsafe sexual behavior                                                                                                                                        | Hispanic                       |                       |                                                                                                                | Individual adolescent development, microsystem (school, family, and peers), mesosystem (parental involvement in school and parental monitoring of peers), and exosystem (parent support |                                                      | Medium                 |

| Name                                 | Country | Targeted disparity        | Pediatric population                  | Environment/Community                                                                                                                                                                                  | Health care provider and systems                          | Individual characteristics and behaviors                                                                                                                              | Health and public policies                                                                                           | Methodological quality |
|--------------------------------------|---------|---------------------------|---------------------------------------|--------------------------------------------------------------------------------------------------------------------------------------------------------------------------------------------------------|-----------------------------------------------------------|-----------------------------------------------------------------------------------------------------------------------------------------------------------------------|----------------------------------------------------------------------------------------------------------------------|------------------------|
|                                      |         |                           |                                       |                                                                                                                                                                                                        |                                                           | network), cultural influences                                                                                                                                         |                                                                                                                      |                        |
| Raphael, 2010 <sup>51</sup>          | Canada  | General health            | Non-specific                          | SES, economy, political/culture/historical factors, income inequality, economic globalization                                                                                                          |                                                           | Personality, health behaviors                                                                                                                                         |                                                                                                                      | Medium                 |
| Raphael and Beal, 2010 <sup>14</sup> | USA     | Racial/ethnic disparities | Pediatric populations in primary care | Social conditions and policies, discrimination, racism, cultural norms, educational system, social/economic gradient, neighborhood socioeconomic status, social capital/cohesion, and civic engagement | Access to care, communication skills, cultural competency | Parental education, child-adult health behaviors and beliefs, and biological pathways and responses                                                                   |                                                                                                                      | Medium                 |
| Salihu, 2011 <sup>77</sup>           | USA     | Infant mortality          | African-American families             |                                                                                                                                                                                                        |                                                           |                                                                                                                                                                       | Community engagement and involvement, capacity building in research, capacity building in development and evaluation | Unclear                |
| Sanders-Phillips, 2014 <sup>55</sup> | USA     | General health            | African American                      |                                                                                                                                                                                                        |                                                           | Age, gender, place of birth, race/ethnicity, place of birth, student work status, depressive symptoms, PTSD, parent ethnicity, average family income, household size, |                                                                                                                      | Unclear                |

| Name                               | Country | Targeted disparity                               | Pediatric population                    | Environment/Community                                                                                                                   | Health care provider and systems                                                                                               | Individual characteristics and behaviors                                                                                             | Health and public policies | Methodological quality |
|------------------------------------|---------|--------------------------------------------------|-----------------------------------------|-----------------------------------------------------------------------------------------------------------------------------------------|--------------------------------------------------------------------------------------------------------------------------------|--------------------------------------------------------------------------------------------------------------------------------------|----------------------------|------------------------|
|                                    |         |                                                  |                                         |                                                                                                                                         |                                                                                                                                | parent work status, perceived racial discrimination                                                                                  |                            |                        |
| Satcher, 2006 <sup>63</sup>        | USA     | General health                                   | Non-specific                            | Immediate environment, non-violent neighborhoods, nutritious food outlets, parity in income, career opportunities, home ownership, hope | Access to care                                                                                                                 | Behavior, genetics                                                                                                                   |                            | Medium                 |
| Schreier, 2013 <sup>71</sup>       | Canada  | Asthma and obesity                               | Non-specific                            | Neighborhood violence and social capital, neighborhood pollution and resources                                                          |                                                                                                                                | Health behaviors and child psychological state, parent violence, parent psychological state                                          |                            | Medium                 |
| Sidora-Arcoleo, 2011 <sup>52</sup> | USA     | Racial/ethnic disparities                        | Children with acute asthma              | Neighborhood poverty                                                                                                                    | Health care setting, parent-provider relationship                                                                              | Parental education, perception of severity, asthma duration, beliefs about contacting healthcare provider, ethnicity, smoke exposure |                            | Medium                 |
| Smith, 2003 <sup>69</sup>          | USA     | Racial-Ethnic Attitudes and Academic Achievement | African-American children               | Teacher barriers, teacher distrust, neighborhood stability                                                                              |                                                                                                                                | Child pride, child barriers, child distrust, parent education, parent pride, college education,                                      |                            | Low                    |
| Sobo, 2006 <sup>33</sup>           | USA     | General health                                   | Children with special health care needs | SES                                                                                                                                     | Access to care, system sensibility (arbitrariness), system fragmentation (poor communication between parts, different doctors, | Sibling issues, language                                                                                                             | Health insurance status    | Medium                 |

| Name                              | Country         | Targeted disparity                                          | Pediatric population                      | Environment/Community            | Health care provider and systems                                                                                                                                                                                                           | Individual characteristics and behaviors                                                                                                                               | Health and public policies                                                                               | Methodological quality |
|-----------------------------------|-----------------|-------------------------------------------------------------|-------------------------------------------|----------------------------------|--------------------------------------------------------------------------------------------------------------------------------------------------------------------------------------------------------------------------------------------|------------------------------------------------------------------------------------------------------------------------------------------------------------------------|----------------------------------------------------------------------------------------------------------|------------------------|
|                                   |                 |                                                             |                                           |                                  | different locations for different services, referral issues), child-friendliness, physician competence, power/intimidation, physician communication problems, differing health beliefs, staff issues (not caring), prejudice, waiting time |                                                                                                                                                                        |                                                                                                          |                        |
| Van der Lucht, 1995 <sup>62</sup> | The Netherlands | General health disparities                                  | 10-11 year old children in primary school | SES-index, housing, overcrowding |                                                                                                                                                                                                                                            | Life style, diet, exercise, sleep behavior, and hygiene, parental tobacco use, living environment, social class of parents (employment status), occupational prestige, |                                                                                                          | Medium                 |
| Wise, 2003 <sup>72</sup>          | USA             | Infant mortality, low birth weight, access to prenatal care | Black and White infants                   | Social class                     | Access to care, coordinated primary care to specialized care                                                                                                                                                                               | Biological causes of birth weight, parental behavior (mother's tobacco smoking, alcohol consumption, illicit drug use)                                                 | Special supplemental program for women, infants and children (WIC), health insurance coverage (Medicaid) | Low                    |

| Name                    | Country | Targeted disparity | Pediatric population                                         | Environment/Community | Health care provider and systems | Individual characteristics and behaviors                                                                                                                                                                                                                                                    | Health and public policies | Methodological quality |
|-------------------------|---------|--------------------|--------------------------------------------------------------|-----------------------|----------------------------------|---------------------------------------------------------------------------------------------------------------------------------------------------------------------------------------------------------------------------------------------------------------------------------------------|----------------------------|------------------------|
| Yoo, 2010 <sup>58</sup> | USA     | General health     | Children of current or former welfare recipients in Illinois |                       | Access to care                   | Resilience (experience of diversity, adaptive outcomes, protective/promotive factors, dental hygiene), health promoting behaviors, routines (bedtime, mealtime), safety practices (seat belt use, child proofing), maternal hardship, food hardship, housing conditions, housing insecurity |                            | Unclear                |
